# Supplementary material
Source: PubMed Central journal article supplement (PMC6426681)
Supplement: NIHMS1005210-supplement-Material.pdf [file NIHMS1005210-supplement-Material.pdf]

## **NOTICE WARNING CONCERNING COPYRIGHT RESTRICTIONS**

The copyright law of the United States [Title 17, United States Code] governs the making of photocopies or other reproductions of copyrighted material. Under certain conditions specified in the law, libraries and archives are authorized to furnish a photocopy or other reproduction. One of these specified conditions is that the reproduction is not to be used for any purpose other than private study, scholarship, or research. If a user makes a request for, or later uses, a photocopy or reproduction for purposes in excess of "fair use," that use may be liable for copyright infringement. This institution reserves the right to refuse to accept a copying order if, in its judgement, fulfillment of the order would involve violation of copyright law. No further reproduction and distribution of this copy is permitted by transmission or any other means.

Supplementary material

| Studies                                            | Randomization<br>(Selection bias) | Allocation<br>concealment<br>(Selection bias) | Blinding of<br>participants and<br>investigators<br>(Performance bias) | Incomplete<br>outcome data<br>(Attrition bias) | Blinding of outcome<br>assessment<br>(Detection bias) | Selective reporting<br>(Reporting bias) |
|----------------------------------------------------|-----------------------------------|-----------------------------------------------|------------------------------------------------------------------------|------------------------------------------------|-------------------------------------------------------|-----------------------------------------|
| DANAMI-3-PRIMULTI                                  | Green                             | Green                                         | Red                                                                    | Green                                          | Green                                                 | Green                                   |
| POLITI et al                                       | Green                             | Green                                         | Red                                                                    | Green                                          | Green                                                 | Green                                   |
| CvLPRIT TRIAL                                      | Green                             | White                                         | Red                                                                    | Green                                          | Green                                                 | Green                                   |
| PRAMI                                              | Green                             | White                                         | Red                                                                    | Green                                          | Green                                                 | Green                                   |
| HAMZA et al                                        | Green                             | Green                                         | Red                                                                    | Green                                          | Green                                                 | Green                                   |
| PRAGUE-13                                          | Green                             | Green                                         | Red                                                                    | Green                                          | Green                                                 | Green                                   |
| HELP-AMI                                           | Green                             | Green                                         | Red                                                                    | Green                                          | Green                                                 | Green                                   |
| GHANI et al                                        | Green                             | White                                         | Red                                                                    | Green                                          | Green                                                 | Green                                   |
| TARASOV et al                                      | Green                             | Green                                         | Red                                                                    | Green                                          | Green                                                 | Green                                   |
| PRIMA                                              | Green                             | Green                                         | Red                                                                    | Green                                          | Green                                                 | Green                                   |
| COMPARE ACUTE                                      | Green                             | Green                                         | Red                                                                    | Green                                          | Green                                                 | Green                                   |
| Low risk=Green; Unclear risk=White; High risk= Red |                                   |                                               |                                                                        |                                                |                                                       |                                         |

Table 1: Cochrane bias risk assessment tool

# A

## Treatment 1 vs. Treatment 2

O.R. (95% Cr.I.)

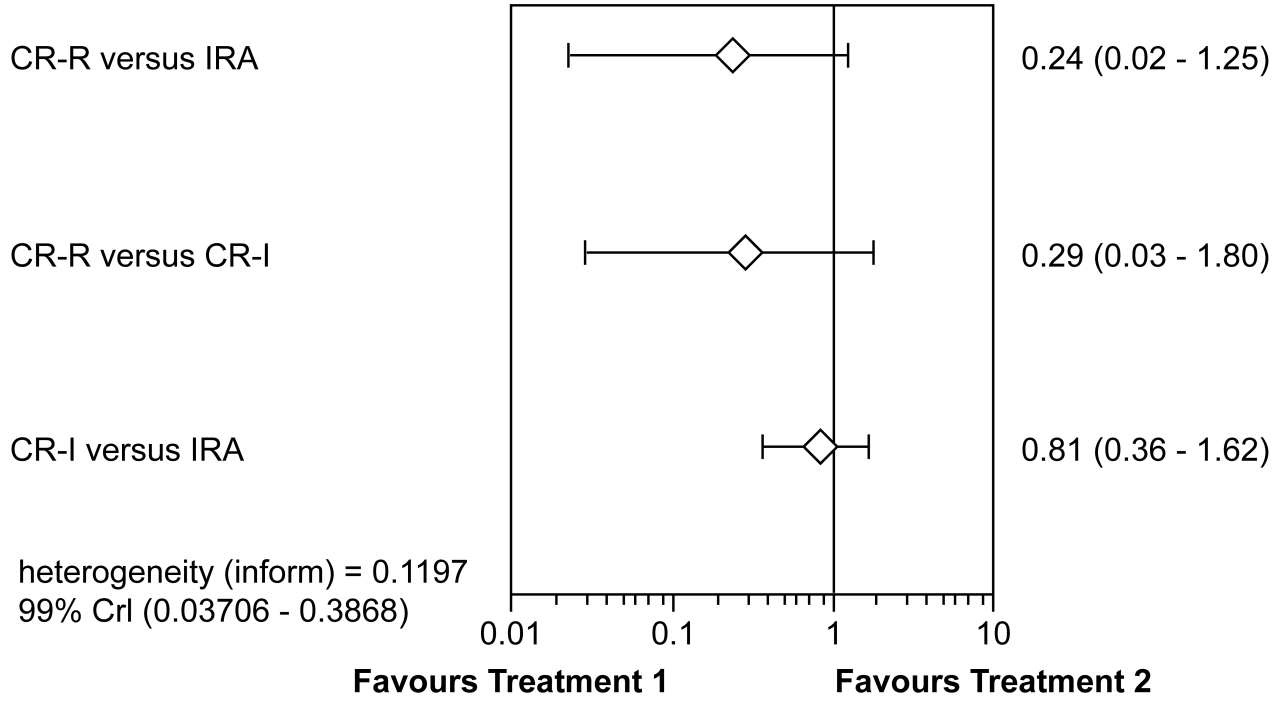

# B

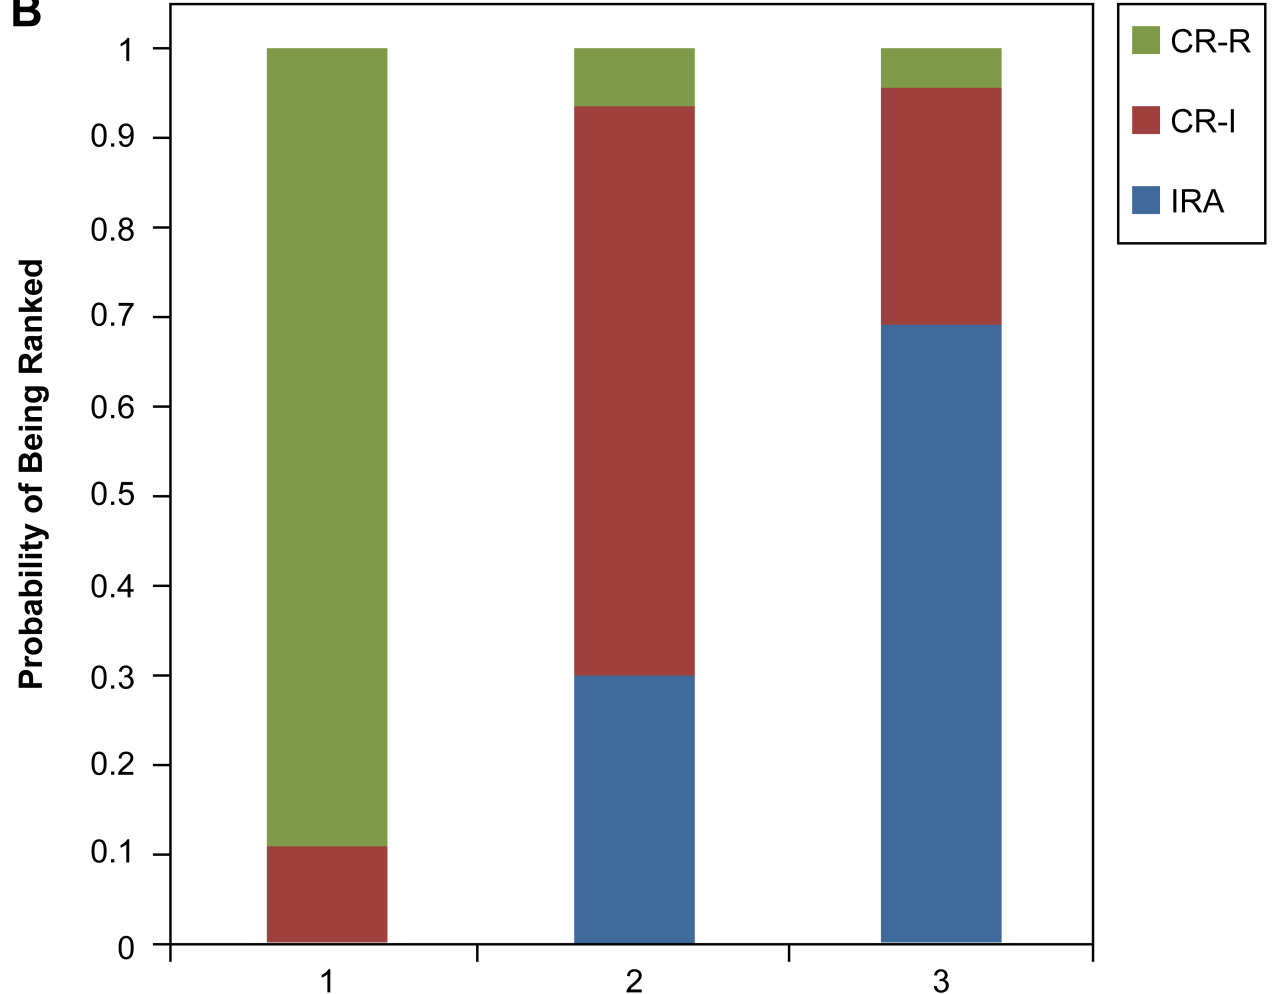

| Treatment | SUCRA |
|-----------|-------|
| CR-R      | 0.92  |
| CR-I      | 0.42  |
| IRA       | 0.16  |
